# Supplementary material for: A formamidinium–methylammonium lead iodide perovskite single crystal exhibiting exceptional optoelectronic properties and long-term stability
Source: Royal Society of Chemistry journal article supplement (doi:10.1039/c7ta04608a), 2017-01-01
Supplement: c7ta04608a1.pdf [file c7ta04608a1.pdf]

## Electronic Supplementary Information

### **Formamidinium-methylammonium lead iodide perovskite single crystal exhibits exceptional optoelectronic properties and long-term stability**

Wen-Guang Li, Hua-Shang Rao, Bai-Xue Chen, Xu-Dong Wang and Dai-Bin Kuang\*

MOE Key Laboratory of Bioinorganic and Synthetic Chemistry, Lehn Institute of Functional Materials, School of Chemistry, Sun Yat-sen University, Guangzhou 510275, P. R. China.

\* Corresponding author

Fax: (+86) 20-84113015

Email: [kuangdb@mail.sysu.edu.cn](mailto:kuangdb@mail.sysu.edu.cn)

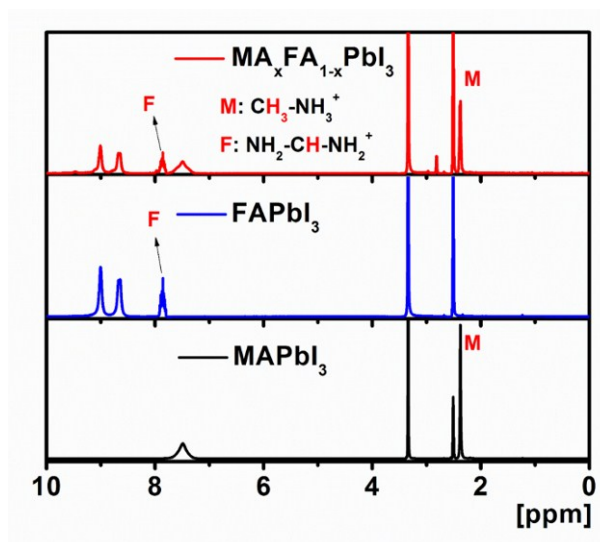

**Fig. S1**  $^1\text{H}$  NMR spectra of  $\text{MAPbI}_3$ ,  $\text{FAPbI}_3$ , and the mixed cation perovskite single crystals.

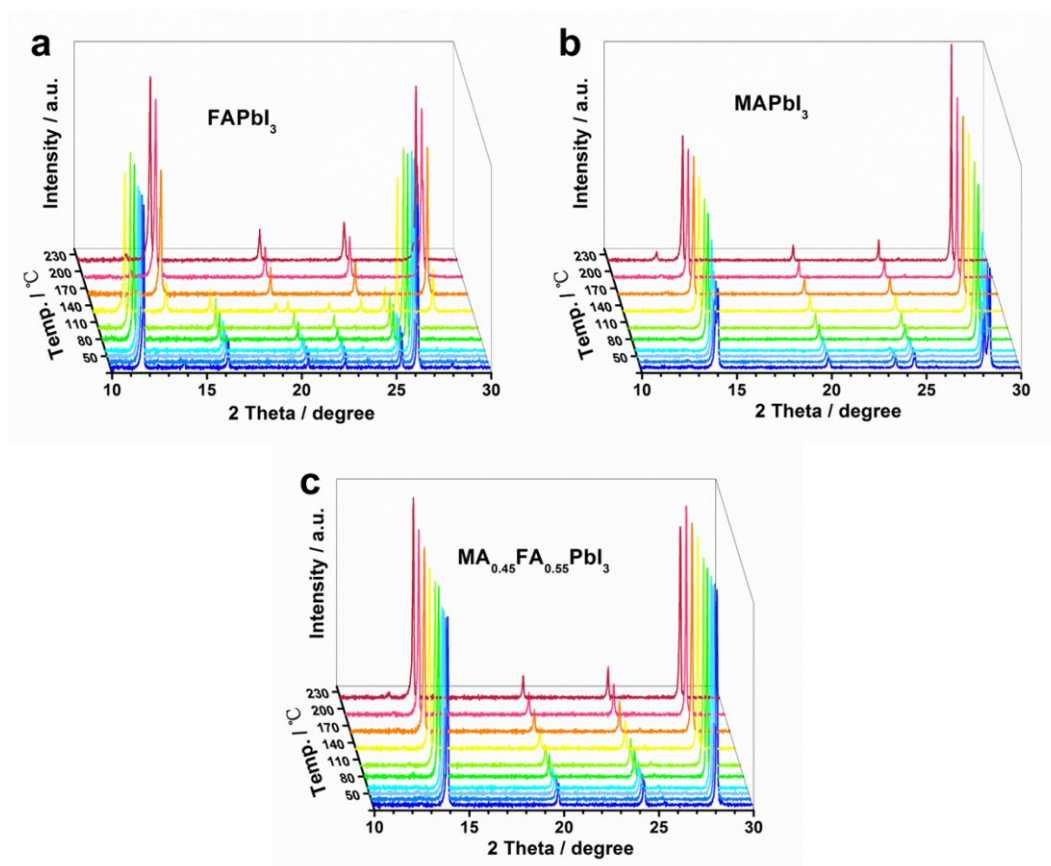

**Fig. S2** Temperature-dependent XRD patterns of (a)  $\text{FAPbI}_3$ , (b)  $\text{MAPbI}_3$ , and (c)  $\text{MA}_{0.45}\text{FA}_{0.55}\text{PbI}_3$  single crystals ground to powder.

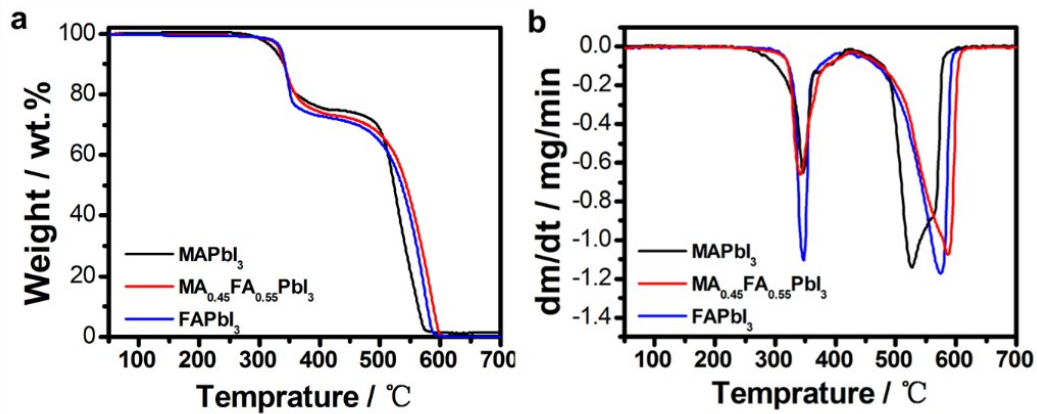

**Fig. S3** TGA curves (a) and their corresponding first derivative curves (b) of MAPbI<sub>3</sub>, FAPbI<sub>3</sub>, and MA<sub>0.45</sub>FA<sub>0.55</sub>PbI<sub>3</sub> single crystals ground to powder.

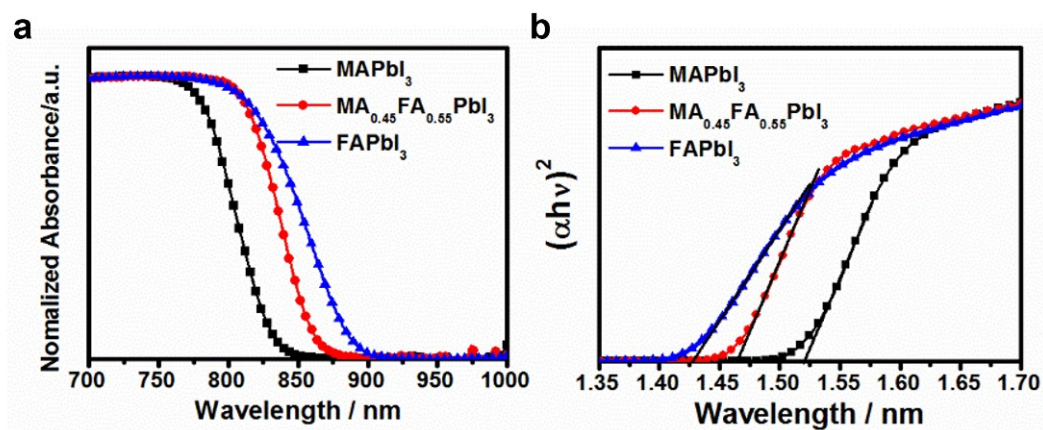

**Fig. S4** (a) UV-vis-NIR absorption spectra and (b) Tauc plots to extract the optical bandgaps of MAPbI<sub>3</sub>, FAPbI<sub>3</sub> and MA<sub>0.45</sub>FA<sub>0.55</sub>PbI<sub>3</sub> single crystals.

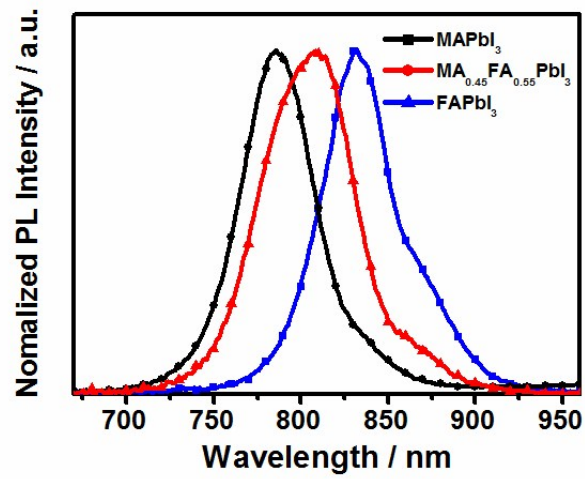

**Fig. S5** Photoluminescence spectra of  $\text{MAPbI}_3$ ,  $\text{FAPbI}_3$  and  $\text{MA}_{0.45}\text{FA}_{0.55}\text{PbI}_3$  single crystals.

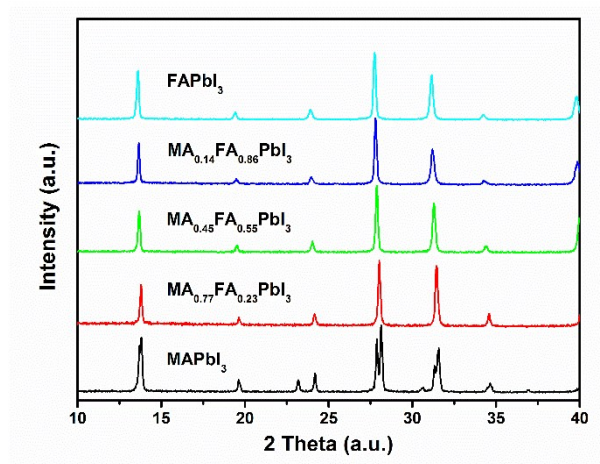

**Fig. S6** The powder XRD spectra of the  $\text{MA}_x\text{FA}_{1-x}\text{PbI}_3$  single crystals with  $x = 0, 0.14, 0.45, 0.77, 1.0$ .

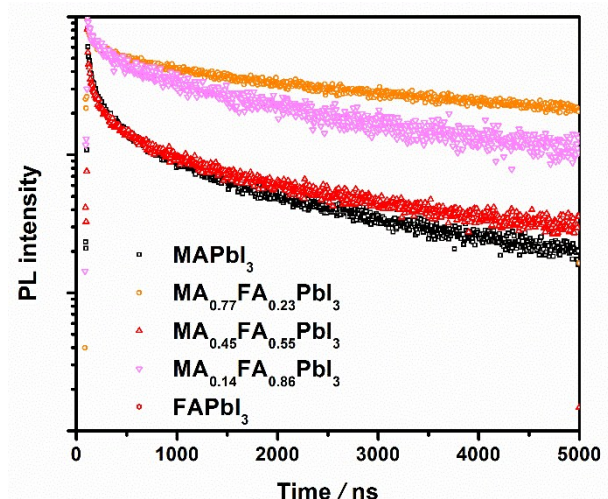

**Fig. S7** Time-resolved photoluminescence spectra of the  $\text{MA}_x\text{FA}_{1-x}\text{PbI}_3$  single crystals with  $x = 0, 0.14, 0.45, 0.77, 1.0$ .

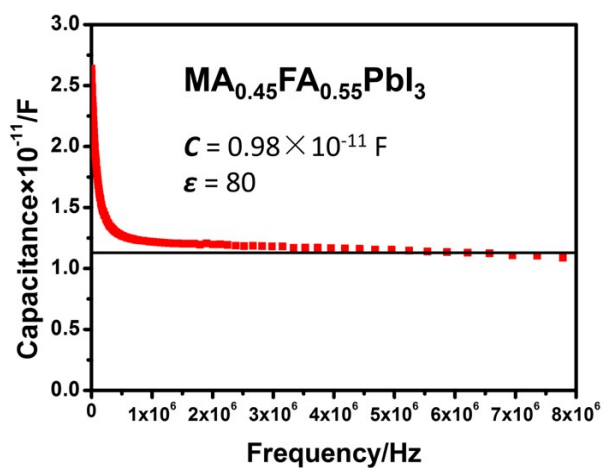

**Fig. S8** The frequency dependent capacitance curve for the  $\text{MA}_{0.45}\text{FA}_{0.55}\text{PbI}_3$  single crystal.

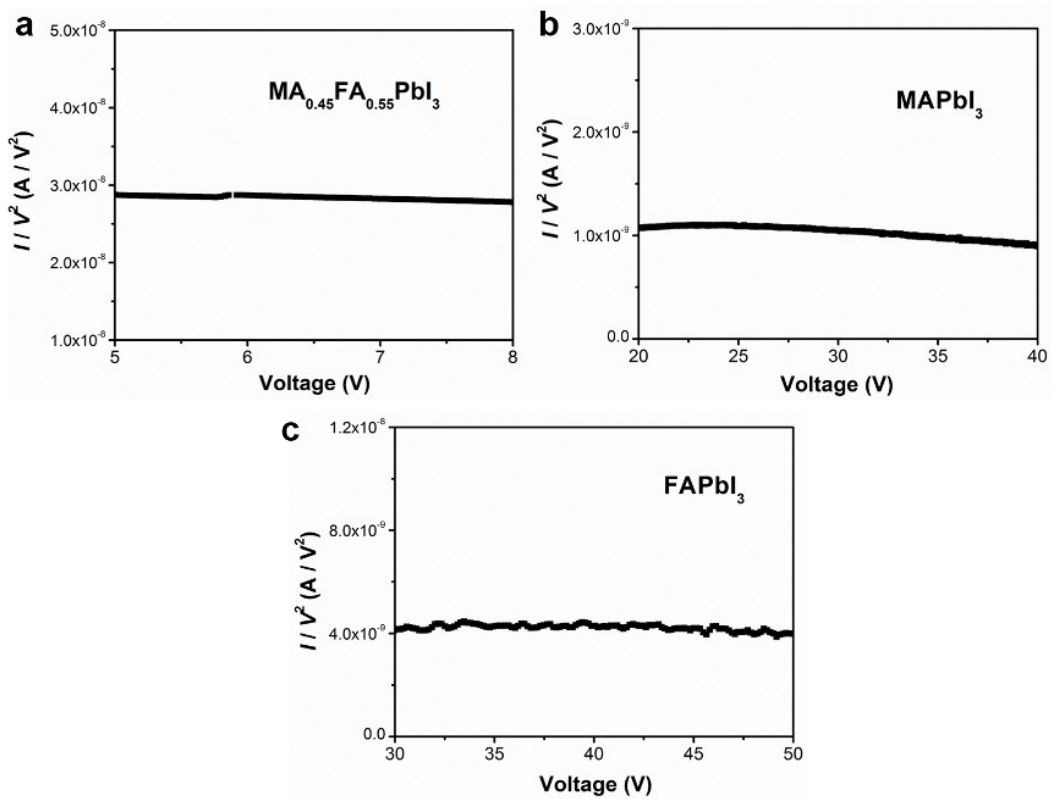

**Fig. S9**  $I/V^2$ - $V$  plots of the dark  $I$ - $V$  curves in Child's region. (a)  $MA_{0.45}FA_{0.55}PbI_3$ , (b)  $MAPbI_3$  and (c)  $FAPbI_3$  single crystal.

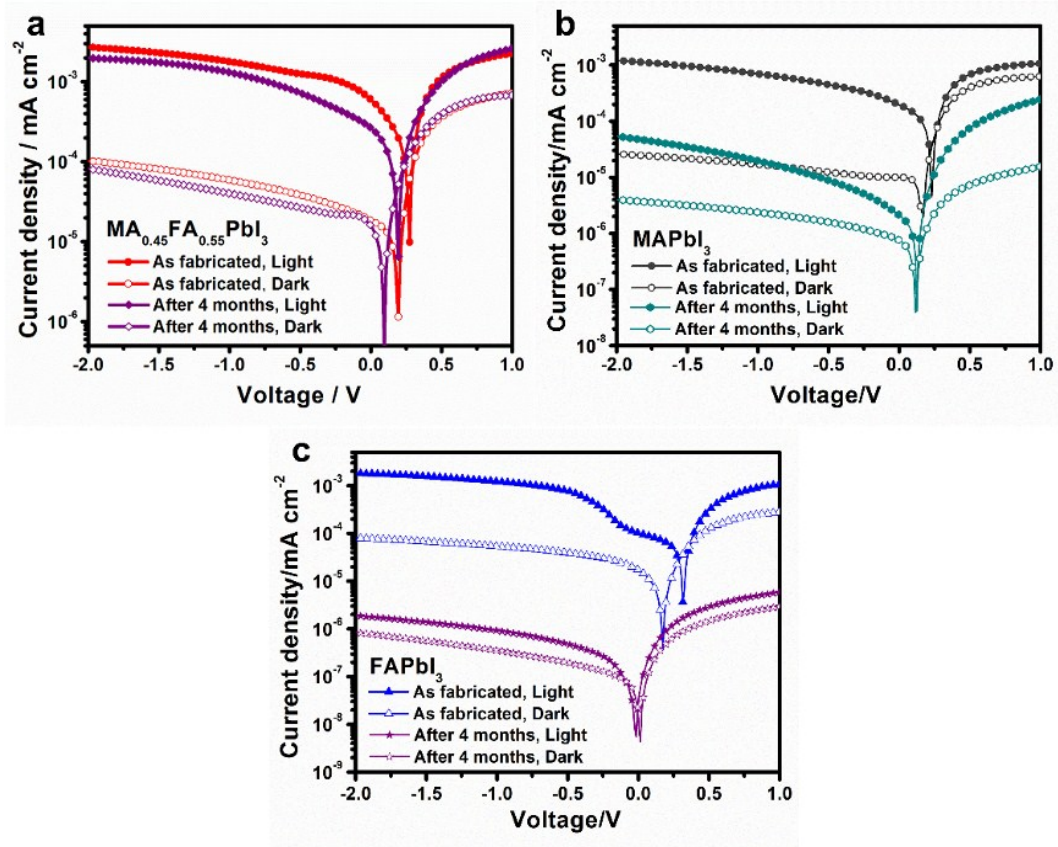

**Fig. S10** Dark current and photocurrent curves of the (a)  $\text{MA}_{0.45}\text{FA}_{0.55}\text{PbI}_3$ , (b)  $\text{MAPbI}_3$  and (c)  $\text{FAPbI}_3$  single-crystal photodetectors and the same devices after stored in an opaque desiccator (RH  $\sim$ 10 %) for 4 months. The photocurrent was measured under illumination of  $\sim 20 \mu\text{W cm}^{-2}$  from 870 nm LED.

**Table S1** Fluorescence lifetime and corresponding intensities derived from the fitting results of the photoluminescence decay curves.

|                                                        | $\tau_1/\text{ns}$ | Rel/% | $\tau_2/\text{ns}$ | Rel/% | $\tau_{\text{total}}/\text{ns}$ |
|--------------------------------------------------------|--------------------|-------|--------------------|-------|---------------------------------|
| MAPbI <sub>3</sub>                                     | 70                 | 15%   | 1053               | 85%   | 906                             |
| MA <sub>0.77</sub> FA <sub>0.23</sub> PbI <sub>3</sub> | 51                 | 4%    | 1162               | 96%   | 1118                            |
| MA <sub>0.45</sub> FA <sub>0.55</sub> PbI <sub>3</sub> | 124                | 4%    | 2205               | 96%   | 2122                            |
| MA <sub>0.14</sub> FA <sub>0.86</sub> PbI <sub>3</sub> | 61                 | 12%   | 1122               | 88%   | 995                             |
| FAPbI <sub>3</sub>                                     | 131                | 6%    | 1714               | 94%   | 1619                            |

**Table S2** The properties comparison of MA<sub>x</sub>FA<sub>1-x</sub>PbI<sub>3</sub> single crystals with literatures.

|                                                        | <i>I</i>             | $\mu$<br>(cm <sup>2</sup> s <sup>-1</sup> V <sup>-1</sup> ) | $n_c$<br>(cm <sup>-3</sup> ) | $n_t$<br>(cm <sup>-3</sup> ) | $\tau$ (μs)<br>(from PL) | $\tau_{1\text{ SUN}}$ (μs)<br>(from TPV) | $L_D$ (μm)<br>(from PL) | $L_D$ (μm)<br>(from TPV) | reference                                                |
|--------------------------------------------------------|----------------------|-------------------------------------------------------------|------------------------------|------------------------------|--------------------------|------------------------------------------|-------------------------|--------------------------|----------------------------------------------------------|
| MAPbI <sub>3</sub>                                     | $1 \times 10^{-8}$   | 2.5                                                         | $2 \times 10^{10}$           | $3.3 \pm 0.3 \times 10^{10}$ | 0.022,<br>1.032          | -                                        | 2, 8                    | -                        | <i>Science</i> , 2015, <b>347</b> , 519-522              |
| MAPbI <sub>3</sub>                                     | -                    | $164 \pm 25$                                                | $9 \pm 2 \times 10^9$        | $3.6 \times 10^{10}$         | -                        | $82 \pm 5$                               | -                       | $175 \pm 25$             | <i>Science</i> , 2015, <b>347</b> , 967-970.             |
| MAPbI <sub>3</sub>                                     | -                    | $167 \pm 35$                                                | -                            | $1.80 \pm 1.07 \times 10^9$  | -                        | -                                        | -                       | -                        | <i>J. Am. Chem. Soc.</i> , 2016, <b>138</b> , 9409-9412. |
| MAPbI <sub>3</sub>                                     | -                    | 39.6                                                        | -                            | $6.0 \times 10^8$            | -                        | -                                        | -                       | -                        | <i>Adv. Mater.</i> , 2016, <b>28</b> , 9204-9209         |
| $\alpha$ -FAPbI <sub>3</sub>                           | $1.1 \times 10^{-7}$ | 4.4                                                         | $1.5 \times 10^{11}$         | $6.2 \times 10^{11}$         | 0.032,<br>0.484          | -                                        | 0.5, 2.2                | -                        | <i>Adv. Mater.</i> , 2016, <b>28</b> , 2253-2258         |
| $\alpha$ -FAPbI <sub>3</sub>                           | $2.2 \times 10^{-8}$ | $35 \pm 7$                                                  | $3.9 \times 10^9$            | $1.1 \times 10^{10}$         | 0.032,<br>0.484          | -                                        | 1.7, 6.6                | -                        | <i>ACS Energy Lett.</i> , 2016, <b>1</b> , 32-37         |
| $\alpha$ -FAPbI <sub>3</sub>                           | $1.8 \times 10^{-8}$ | $40 \pm 5$                                                  | $2.8 \times 10^9$            | $1.34 \times 10^{10}$        | -                        | -                                        | -                       | -                        | <i>Adv. Optical Mater.</i> , 2016, <b>4</b> , 1829-1837  |
| MAPbI <sub>3</sub>                                     | $1.1 \times 10^{-8}$ | $65 \pm 6$                                                  | $1.0 \times 10^9$            | $1.1 \times 10^{10}$         | 0.070,<br>0.906          | 80                                       | 3.4, 12.3               | 115                      | Present work                                             |
| $\alpha$ -FAPbI <sub>3</sub>                           | $2.2 \times 10^{-8}$ | $150 \pm 15$                                                | $9.5 \times 10^8$            | $8.2 \times 10^9$            | 0.131,<br>1.619          | 37                                       | 7.1, 25.0               | 118                      | Present work                                             |
| MA <sub>0.45</sub> FA <sub>0.55</sub> PbI <sub>3</sub> | $1.7 \times 10^{-7}$ | $271 \pm 60$                                                | $3.9 \times 10^9$            | $2.6 \times 10^9$            | 0.124,<br>2.122          | 93                                       | 9.29, 38.4              | 254                      | Present work                                             |
